# Supplementary material
Source: publisher figshare collection journal article supplement (https://tandf.figshare.com/ndownloader/files/22293792)
Supplement: Supplementary file [file 22293792]

## Supplementary data

Table 6. Cox proportional hazards models with endpoint revision for any reason and due to dislocation, stratified by sex

| Outcome<br>Head size        | Univariable model  |                  | Multivariable model |                  |
|-----------------------------|--------------------|------------------|---------------------|------------------|
|                             | Females<br>HR (CI) | Males<br>HR (CI) | Females<br>HR (CI)  | Males<br>HR (CI) |
| Revision for any reason     |                    |                  |                     |                  |
| 32-mm                       | 1                  | 1                | 1                   | 1                |
| 36-mm                       | 1.1 (0.8–1.5)      | 0.8 (0.5–1.1)    | 1.1 (0.8–1.5)       | 0.8 (0.5–1.2)    |
| Revision due to dislocation |                    |                  |                     |                  |
| 32-mm                       | 1                  | 1                | 1                   | 1                |
| 36-mm                       | 0.8 (0.5–1.5)      | 0.8 (0.3–1.8)    | 0.8 (0.5–1.5)       | 0.9 (0.4–1.9)    |

The multivariable model was adjusted for patient age, year of surgery, and type of surgical approach.  
HR (CI) = Hazard ratio (95% confidence interval)

Table 7. Univariable Cox proportional model stratified by national register. Hazard ratios refer to 36-mm heads with 32-mm as the reference

| Nation  | n     | Revision for any reason |               | Revision due to dislocation |               |
|---------|-------|-------------------------|---------------|-----------------------------|---------------|
|         |       | Revisions (%)           | HR (CI)       | Revisions (%)               | HR (CI)       |
| Denmark | 2,088 | 128 (6.1)               | 1.0 (0.7–1.4) | 40 (1.9)                    | 1.3 (0.7–2.5) |
| Norway  | 712   | 30 (4.3)                | 0.4 (0.1–1.2) | 4 (0.6)                     | <sup>a</sup>  |
| Sweden  | 1,280 | 28 (2.2)                | 0.8 (0.4–1.6) | 11 (0.9)                    | 0.9 (0.3–2.8) |
| Finland | 950   | 47 (5.0)                | 0.8 (0.4–1.4) | 18 (1.9)                    | 0.2 (0.1–0.4) |

HR (CI) = Hazard ratio (95% confidence interval)

<sup>a</sup> Hazard ratio and CIs could not be calculated.

Table 8. Distribution of head size for each nation contributing to NARA. Values are number (%)

| Nation  | 32-mm THA  | 36-mm THA  |
|---------|------------|------------|
| Denmark | 1,019 (41) | 1,069 (43) |
| Norway  | 560 (22)   | 152 (6)    |
| Sweden  | 661 (26)   | 619 (25)   |
| Finland | 275 (11)   | 675 (26)   |

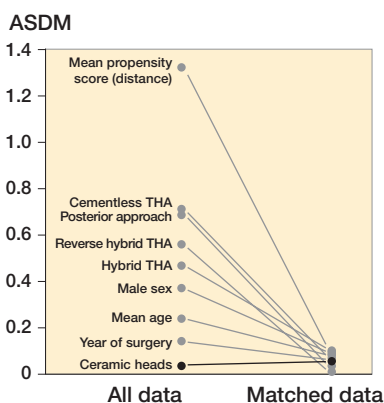

Figure 3. The absolute standardized difference in means (ASDM) between 32- and 36-mm groups before and after matching

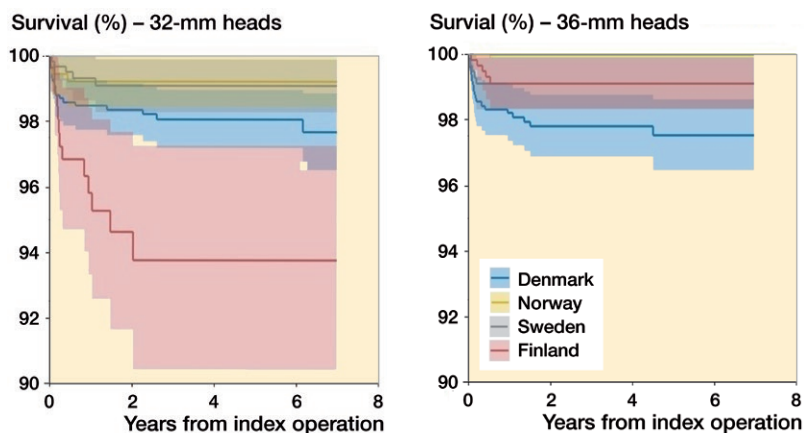

Figure 6. Kaplan–Meier survival for each national register with endpoint revision due to dislocation separately for 32-mm (left panel) and 36-mm (right panel) THA. 36-mm THA seems to perform quite equally among the 4 national registers while 32-mm THA seems to have a poorer Kaplan–Meier survival in the Finish Register compared with the remaining 3 national registers.
